# Supplementary material
Source: publisher figshare collection journal article supplement (https://sage.figshare.com/ndownloader/files/14507417)
Supplement: Supplementary file 1 [file 14507417]

### **Additional information regarding data extraction and management**

Solomon, Ono, Timmer, and Goodlin-Jones (2008) provided mean and standard deviation (SD) data for the PSI not included in the original publication. The trial data for this study had been archived and available data sent by the trial author was missing means and SDs for two participants in the WLC group; it was decided to include the provided data in analyses but was noted as a risk of bias.

Kuravackel et al. (2017) provided mean and SD data for the ECBI, PSI and PSOC not included in the original publication.

SDs for Zand et al. (2017) and Bearss et al. (2015) were calculated from published mean and confidence interval (CI) data using the formula for missing SD data provided in the Cochrane handbook (Higgins & Green, 2011).

Two included trials (Kuravackel et al., 2017; Sofronoff, Leslie, & Brown, 2004) had two BPI treatment arms (Sofronoff et al. (2004) individual and workshop; Kuravackel et al. (2017) face to face and telehealth) eligible for inclusion. Given the main difference between intervention arms was the format of delivery, means and SDs for the two treatment arms were combined using the calculator function in RevMan to avoid potential result choice bias (Higgins & Green, 2011).

### **Additional information regarding selective reporting bias**

Study protocols were only available for 3/9 RCTs (Bearss et al., 2015; Tellegen & Sanders, 2014; Zand et al., 2017). It was therefore deemed more appropriate to assess selective reporting for all trials according to whether they reported results for all outcomes listed in the methods section of the report. However, the authors note some discrepancies between published trial registries and reported outcomes. Bears et al 2015 report the use of an

observational measure (the Standardized Observational Analogue Procedure; SOAP) in the trial paper. SOAP data is not analysed but is justified due to questions of its ecological validity. However, the SOAP is not listed in the trial registration. Furthermore, Iadarola et al. (2017) report PSI and PSOC outcomes from the original Bearss et al. (2015) RCT, yet these outcomes are also not listed in the trial registry.
